# Supplementary material for: Survey of Smartphones, Medical Mobile Apps and Generative AI Use among Medical Students in Nigeria: A Case Study
Source: Research Square preprint supplement (doi:10.21203/rs.3.rs-7576725/v1), 2025-10-17
Supplement: Supplementary file 1 [file f8f5692aed3cb638ad65c348.docx]

# Appendix 1: Survey on Smartphones, Medical Apps, and Generative AI Use Among Medical Students at FUHSI

Dear respondent,
This survey is designed to assess smartphone ownership, use of medical applications, and the role of generative AI in learning among medical students. Your responses will be kept confidential and used strictly for academic research purposes. Kindly answer honestly.

## Section 1: Demographic Information

1. 1. Gender:

☐ Male

☐ Female

1. 2. Level of study:

☐ 100 Level

☐ 200 Level

☐ 300 Level

## Section 2: Ownership and Access to Smartphones, Medical Apps, and Generative AI

1. 1. Do you own a smartphone?

☐ Yes

☐ No

1. 2. What type of smartphone do you use?

☐ Android

☐ iPhone

☐ Others (please specify): __________

1. 3. Does your smartphone have internet access?

☐ Yes

☐ No

1. 4. Do you have any medical applications installed on your smartphone?

☐ Yes

☐ No

1. 5. Are you aware of generative AI tools (e.g., ChatGPT, Bard, Med-PaLM)?

☐ Yes

☐ No

1. 6. Do you currently use any generative AI tools for academic purposes?

☐ Yes

☐ No

## Section 3: Extent of Smartphone Use for Academic Activities

1. 1. On average, how many hours per day do you use your smartphone for academic purposes?

☐ Less than 1 hour

☐ 1–2 hours

☐ 3–4 hours

☐ More than 5 hours

## Section 4: Purpose of Smartphone Use

1. 1. For what purposes do you use your smartphone? (Select all that apply)

☐ Reading lecture notes or e-books

☐ Watching medical tutorials or lectures

☐ Participating in online discussions or study groups

☐ Taking notes during class or clinical sessions

☐ Researching academic content online

☐ Others (please specify): __________

## Section 5: Types of Medical Apps Used

1. 1. Which medical applications do you use? (Select all that apply)

☐ Anatomy learning apps (e.g., Complete Anatomy, 3D Human Anatomy, Kenhub)

☐ Basic sciences revision apps (e.g., Physiology & Biochemistry flashcards, Osmosis, Lecturio)

☐ Medical dictionary/reference apps (e.g., Taber’s, Dorland’s)

☐ Medical terminology apps

☐ Exam preparation apps (e.g., MBBSPrep, USMLE Step 1, AMBOSS)

☐ Interactive learning platforms (e.g., Osmosis, Visible Body, TeachMeAnatomy)

☐ Drug classification/pharmacology apps (e.g., BNF, Drugs.com)

☐ Others (please specify): __________

1. 2. How frequently do you use medical apps in your learning?

☐ Daily

☐ Weekly

☐ Occasionally

☐ Never

## Section 6: Frequency and Patterns of Generative AI Use

1. 1. Which generative AI tools have you used for academic purposes? (Select all that apply)

☐ ChatGPT

☐ Google Bard

☐ Microsoft Copilot

☐ Med-PaLM

☐ Others (please specify): __________

☐ I have not used any generative AI tools

1. 2. How often do you use generative AI tools in your academic work?

☐ Daily

☐ Weekly

☐ Occasionally

☐ Rarely

☐ Never

1. 3. In what ways do you use generative AI tools? (Select all that apply)

☐ Generating summaries of complex topics

☐ Clarifying difficult medical concepts

☐ Practicing clinical scenarios or MCQs

☐ Drafting assignments or research work

☐ Generating study schedules or reminders

☐ Others (please specify): __________
